# Supplementary material
Source: publisher site journal article supplement (https://www.spandidos-publications.com/1335/downloadSupplementary)

Figure S1. Estimation of the cut-off value for the age at diagnosis stratification determined by X-tile software. (A)  $\chi^2$  log-rank values were calculated using X-tile software (21). (B) Number of patients diagnosed at different ages; blue, <68 years; grey, 68-78 years; pink, >78 years. (C) Survival probability of patients diagnosed at different ages.

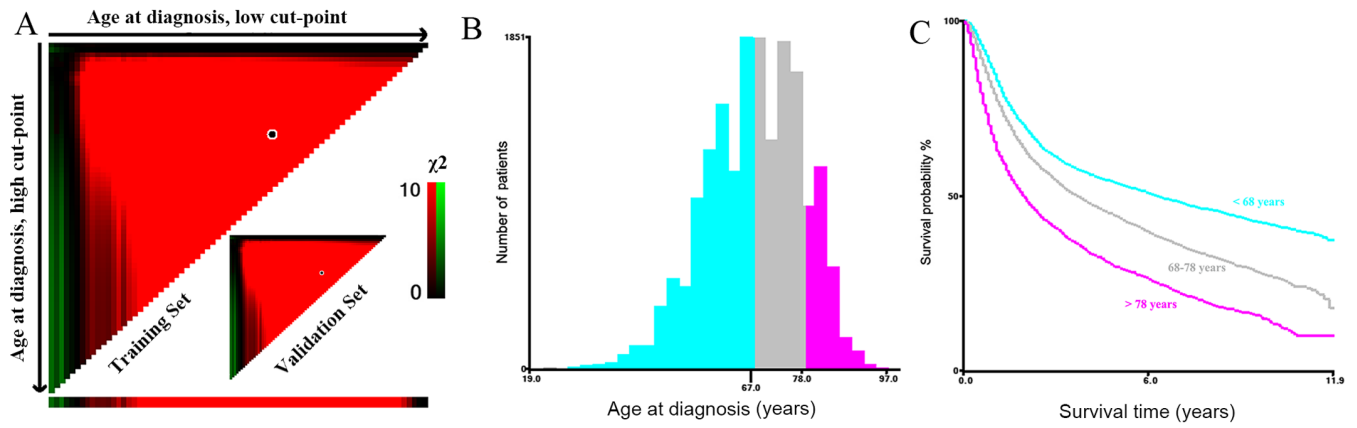

Supplement: Supplementary file 1 [file downloadSupplementary]
